# Supplementary material for: The Pentameric Nucleoplasmin Fold Is Present in Drosophila FKBP39 and a Large Number of Chromatin-Related Proteins
Source: PubMed Central journal article supplement (PMC4414354; doi:10.1016/j.jmb.2015.03.010), 2015-05-22
Supplement: mmc1.pdf [file mmc1.pdf]

## Supplementary Table 1 - phylogeny

### *Supplementary methods for generating the phylogenetic tree*

HMMER<sup>1</sup> online<sup>a</sup> was run with standard parameters (E-value cutoff of 0.03) and the first 93 residues of *Drosophila melanogaster* FKBP39 protein as input against the “Uniprot reference proteome” database. The search was repeated three times with all hits above threshold of the previous rounds contributing to the profile of the following run. Protein sequences from a selection of representative species were downloaded, aligned again with Mafft<sup>2</sup> and further edited by hand based on the structural alignment between FKBP39 and *Xenopus* nucleoplasmin (1KJ5). Columns with more than 90% gaps were removed with a Python script. Pairwise distances were calculated and a tree constructed using the Philip<sup>3</sup> neighbour-joining algorithm. The resulting unrooted tree was visualised and plotted with DrawTree (part of the Phylip package).

---

<sup>a</sup>url:<http://hmmer.janelia.org/search/hmmsearch>

|    | Uniprot.ID      | Species                   | Common.name   | Function      | Kingdom  | ID     |
|----|-----------------|---------------------------|---------------|---------------|----------|--------|
| 1  | A0NDN1_ANOGA    | Anopheles gambiae         | mosquito      | nucleoplasmin | Animals  | ANOGA1 |
| 2  | Q7QJE1_ANOGA    | Anopheles gambiae         | mosquito      | NPL-FKBP      | Animals  | ANOGA2 |
| 3  | H9KHI9_APIME    | Apis mellifera            | honey bee     | NPL-FKBP      | Animals  | APIME1 |
| 4  | H9KH00_APIME    | Apis mellifera            | honey bee     | nucleoplasmin | Animals  | APIME2 |
| 5  | E1C540_CHICK    | Gallus gallus             | chicken       | nucleoplasmin | Animals  | CHICK1 |
| 6  | NLP_DROME       | Drosophila melanogaster   | fruit fly     | nucleoplasmin | Animals  | DROME1 |
| 7  | Q9VAC4_DROME    | Drosophila melanogaster   | fruit fly     | nucleoplasmin | Animals  | DROME2 |
| 8  | FKB39_DROME     | Drosophila melanogaster   | fruit fly     | NPL-FKBP      | Animals  | DROME3 |
| 9  | F7CKP2_HORSE    | Equus caballus            | horse         | nucleoplasmin | Animals  | HORSE1 |
| 10 | K9K3J3_HORSE    | Equus caballus            | horse         | nucleoplasmin | Animals  | HORSE2 |
| 11 | NPM3_HUMAN      | Homo sapiens              | human         | nucleoplasmin | Animals  | HUMAN1 |
| 12 | NPM_HUMAN       | Homo sapiens              | human         | nucleoplasmin | Animals  | HUMAN2 |
| 13 | F6VS63_ORNAN    | Ornithorhynchus anatinus  | platypus      | nucleoplasmin | Animals  | ORNAN1 |
| 14 | F6YUB8_ORNAN    | Ornithorhynchus anatinus  | platypus      | nucleoplasmin | Animals  | ORNAN2 |
| 15 | E0VJG3_PEDHC    | Pediculus humanus         | louse         | NPL-FKBP      | Animals  | PEDHC1 |
| 16 | E0V9N0_PEDHC    | Pediculus humanus         | louse         | nucleoplasmin | Animals  | PEDHC2 |
| 17 | NPM_RAT         | Rattus norvegicus         | rat           | nucleoplasmin | Animals  | RAT1   |
| 18 | F7FKF2_RAT      | Rattus norvegicus         | rat           | nucleoplasmin | Animals  | RAT2   |
| 19 | Q7M6Z1_RAT      | Rattus norvegicus         | rat           | nucleoplasmin | Animals  | RAT3   |
| 20 | Q4SCS8_TETNG    | Tetraodon nigroviridis    | pufferfish    | nucleoplasmin | Animals  | TETNG1 |
| 21 | Q28FE3_XENTR    | Xenopus tropicalis        | frog          | nucleoplasmin | Animals  | XENTR1 |
| 22 | F7DW01_XENTR    | Xenopus tropicalis        | frog          | nucleoplasmin | Animals  | XENTR2 |
| 23 | FKBP3_CANAL     | Candida albicans          |               | NPL-FKBP      | Fungi    | CANAL1 |
| 24 | FKBP4_CRYNJ     | Cryptococcus neoformans   |               | NPL-FKBP      | Fungi    | CRYNJ1 |
| 25 | FKBP4_NEUCR     | Neurospora crassa         |               | NPL-FKBP      | Fungi    | NEUCR1 |
| 26 | FKBPH_SCHPO     | Schizosaccharomyces pombe | fission yeast | NPL-FKBP      | Fungi    | SCHPO1 |
| 27 | FKBP4_SCHPO     | Schizosaccharomyces pombe | fission yeast | NPL-FKBP      | Fungi    | SCHPO2 |
| 28 | FKBP4_YEAST     | Saccharomyces cerevisiae  | baker's yeast | NPL-FKBP      | Fungi    | YEAST1 |
| 29 | FKBP3_YEAST     | Saccharomyces cerevisiae  | baker's yeast | NPL-FKBP      | Fungi    | YEAST2 |
| 30 | HD-tuinT4_ARATH | Arabidopsis thaliana      | thale cress   |               | Plants   | ARATH1 |
| 31 | HD-tuinT3_ARATH | Arabidopsis thaliana      | thale cress   | HD-tuin       | Plants   | ARATH2 |
| 32 | HD-tuinT1_ARATH | Arabidopsis thaliana      | thale cress   | HD-tuin       | Plants   | ARATH3 |
| 33 | HD-tuinT2_ARATH | Arabidopsis thaliana      | thale cress   |               | Plants   | ARATH4 |
| 34 | FKB53_ARATH     | Arabidopsis thaliana      | thale cress   | NPL-FKBP      | Plants   | ARATH5 |
| 35 | FKB43_ARATH     | Arabidopsis thaliana      | thale cress   | NPL-FKBP      | Plants   | ARATH6 |
| 36 | A8IYI1_CHLRE    | Chlamydomonas reinhardtii | algae         |               | Protists | CHLRE  |
| 37 | A9P996_POPTR    | Populus trichocarpa       | poplar        | HD-tuin       | Plants   | POPTR1 |
| 38 | B9HG89_POPTR    | Populus trichocarpa       | poplar        |               | Plants   | POPTR2 |
| 39 | A9P950_POPTR    | Populus trichocarpa       | poplar        | HD-tuin       | Plants   | POPTR3 |
| 40 | B9MTN7_POPTR    | Populus trichocarpa       | poplar        | HD-tuin       | Plants   | POPTR4 |
| 41 | K4D3Z0_SOLLC    | Solanum lycopersicum      | tomato        | HD-tuin       | Plants   | SOLLC1 |
| 42 | K4D9U1_SOLLC    | Solanum lycopersicum      | tomato        |               | Plants   | SOLLC2 |
| 43 | K4AZ74_SOLLC    | Solanum lycopersicum      | tomato        | NPL-FKBP      | Plants   | SOLLC3 |
| 44 | K4CQT3_SOLLC    | Solanum lycopersicum      | tomato        | HD-tuin       | Plants   | SOLLC4 |
| 45 | K4BEE0_SOLLC    | Solanum lycopersicum      | tomato        | NPL-FKBP      | Plants   | SOLLC5 |
| 46 | D7T228_VITVI    | Vitis vinifera            | wine grape    | NPL-FKBP      | Plants   | VITVI1 |
| 47 | D7TQZ5_VITVI    | Vitis vinifera            | wine grape    | NPL-FKBP      | Plants   | VITVI2 |
| 48 | D7SN59_VITVI    | Vitis vinifera            | wine grape    | HD-tuin       | Plants   | VITVI3 |
| 49 | F6HKH5_VITVI    | Vitis vinifera            | wine grape    | HD-tuin       | Plants   | VITVI4 |

Table 1: Proteins used to generate the phylogenetic tree in Fig. 1. Plant proteins that are not functionally annotated are in all cases HD-tuins where at least one of the coordinating residues in the zinc finger is mutated.

|    | Species                          | Common name   | Kingdom  | Proteins |
|----|----------------------------------|---------------|----------|----------|
| 1  | <i>Anopheles gambiae</i>         | mosquito      | Animals  | 2        |
| 2  | <i>Apis mellifera</i>            | honey bee     | Animals  | 2        |
| 3  | <i>Arabidopsis thaliana</i>      | thale cress   | Plants   | 6        |
| 4  | <i>Candida albicans</i>          |               | Fungi    | 1        |
| 5  | <i>Chlamydomonas reinhardtii</i> | algae         | Protists | 1        |
| 6  | <i>Cryptococcus neoformans</i>   |               | Fungi    | 1        |
| 7  | <i>Drosophila melanogaster</i>   | fruit fly     | Animals  | 3        |
| 8  | <i>Equus caballus</i>            | horse         | Animals  | 2        |
| 9  | <i>Gallus gallus</i>             | chicken       | Animals  | 1        |
| 10 | <i>Homo sapiens</i>              | human         | Animals  | 2        |
| 11 | <i>Neurospora crassa</i>         |               | Fungi    | 1        |
| 12 | <i>Ornithorhynchus anatinus</i>  | platypus      | Animals  | 2        |
| 13 | <i>Pediculus humanus</i>         | louse         | Animals  | 2        |
| 14 | <i>Populus trichocarpa</i>       | poplar        | Plants   | 4        |
| 15 | <i>Rattus norvegicus</i>         | rat           | Animals  | 3        |
| 16 | <i>Saccharomyces cerevisiae</i>  | baker's yeast | Fungi    | 2        |
| 17 | <i>Schizosaccharomyces pombe</i> | fission yeast | Fungi    | 2        |
| 18 | <i>Solanum lycopersicum</i>      | tomato        | Plants   | 5        |
| 19 | <i>Tetraodon nigroviridis</i>    | pufferfish    | Animals  | 1        |
| 20 | <i>Vitis vinifera</i>            | wine grape    | Plants   | 4        |
| 21 | <i>Xenopus tropicalis</i>        | frog          | Animals  | 2        |

Table 2: Summary of species in Table 1. CHLRE is a unicellular alga which are sometimes classified as plants and sometimes as protists.

## References

- [1] Eddy, S. R. (2011). Accelerated Profile HMM Searches. *PLoS Comput. Biol.* 7, e1002195.
- [2] Katoh, K., & Standley, D. M. (2013). Mafft multiple sequence alignment software version 7: Improvements in performance and usability. *Mol. Biol. and Evol.* 30, 772–780.
- [3] Farris, J. S. (1989). *Notices. Cladistics* 5, 163–166.
