# Supplementary material for: The Pentameric Nucleoplasmin Fold Is Present in Drosophila FKBP39 and a Large Number of Chromatin-Related Proteins
Source: PubMed Central journal article supplement (PMC4414354; doi:10.1016/j.jmb.2015.03.010), 2015-05-22
Supplement: mmc4.pdf [file mmc4.pdf]

## FKBP39\_1-150\_CprA

| CG      | Size   | Score | # of peptides | Full Name                           | Function                 |
|---------|--------|-------|---------------|-------------------------------------|--------------------------|
| CG7439  | 137677 | 1558  | 59            | Argonaute 2                         |                          |
| CG6226  | 39376  | 1545  | 81            | FKBP39 (bait)                       |                          |
| CG4264  | 71372  | 1519  | 64            | Heat shock protein cognate 4        |                          |
| CG6501  | 76674  | 658   | 25            | Ngp                                 |                          |
| CG5436  | 70043  | 509   | 16            | Heat shock protein 68               |                          |
| CG18743 | 70516  | 509   | 16            | Heat-shock-protein-70Ab             |                          |
| CG4147  | 72330  | 428   | 13            | Heat shock protein cognate 3        |                          |
| CG7808  | 23859  | 389   | 9             | Ribosomal protein S8                |                          |
| CG4389  | 84478  | 386   | 13            |                                     |                          |
| CG5502  | 45112  | 315   | 14            | Ribosomal protein L4                |                          |
| CG16973 | 121355 | 313   | 11            | misshapen                           | Signalling               |
| CG6875  | 231517 | 296   | 10            | abnormal spindle                    |                          |
| CG10360 | 65776  | 282   | 12            | refractory to sigma P               |                          |
| CG3751  | 15095  | 276   | 7             | Ribosomal protein S24               |                          |
| CG9277  | 50571  | 269   | 12            | beta-Tubulin at 56D                 |                          |
| CG10805 | 238952 | 264   | 9             | UTP10 homolog                       | small-subunit processome |
| CG12819 | 158956 | 260   | 7             | slender lobes                       | nucleolus                |
| CG17498 | 23618  | 255   | 7             | mad2                                | spindle checkpoint       |
| CG4463  | 20730  | 254   | 10            | Heat shock protein 23               |                          |
| CG14648 | 59934  | 253   | 8             |                                     |                          |
| CG12261 | 45873  | 249   | 11            | mitochondrial ribosomal protein S22 |                          |
| CG9282  | 17623  | 239   | 5             | Ribosomal protein L24               |                          |
| CG4863  | 45806  | 235   | 6             | Ribosomal protein L3                |                          |
| CG8064  | 104226 | 208   | 6             | UTP12, DIP2 homolog                 | small-subunit processome |
| CG12301 | 88731  | 205   | 5             | UTP14 homolog                       | small-subunit processome |
| CG2512  | 50486  | 204   | 7             | alpha-Tubulin at 84D                |                          |
| CG8280  | 50561  | 190   | 12            | Elongation factor 1alpha48D         |                          |
| CG6253  | 19219  | 180   | 4             | Ribosomal protein L14               |                          |
| CG5728  | 160619 | 170   | 5             | RRP5 homolog                        | small-subunit processome |
| CG7728  | 133752 | 169   | 5             | BMS1 homolog                        | ribosome assembly        |
| CG4466  | 23659  | 164   | 9             | Heat shock protein 27               |                          |
| CG9799  | 104155 | 162   | 7             | UTP21 homolog                       | small-subunit processome |
| CG12775 | 18521  | 161   | 5             | Ribosomal protein L21               |                          |
| CG8857  | 18265  | 161   | 5             | Ribosomal protein S11               |                          |
| CG6815  | 68489  | 160   | 5             | belphegor                           |                          |
| CG4183  | 23208  | 158   | 6             | Heat shock protein 26               |                          |
| CG2168  | 30549  | 154   | 3             | Ribosomal protein S3A               |                          |
| CG3195  | 17891  | 154   | 3             | Ribosomal protein L12               |                          |
| CG12396 | 79289  | 150   | 5             | NNP-1 homolog, RRP1-like protein    | rRNA processing          |
| CG1489  | 45999  | 142   | 2             | Pros45                              |                          |
| CG1671  | 89564  | 142   | 4             | UTP13 homolog                       | small-subunit processome |
| CG1994  | 113659 | 139   | 3             | p110, GCN5 related                  | PRC1 complex             |
| CG4554  | 313818 | 137   | 6             | UTP20 homolog                       | small subunit processome |
| CG7490  | 34295  | 136   | 4             | Ribosomal protein LP0               |                          |
| CG9300  | 76766  | 136   | 4             | NOL11 homolog                       | nucleolus                |
| CG13849 | 55031  | 135   | 3             | Nop56                               | small subunit processome |
| CG1263  | 27989  | 135   | 3             | Ribosomal protein L8                |                          |
| CG4581  | 51009  | 134   | 6             | Thiolase                            |                          |
| CG3401  | 51387  | 131   | 6             | beta-Tubulin at 60D                 |                          |

## FKBP39\_1-150\_CprA

| CG      | Size   | Score | # of peptides | Full Name                                                | Function                           |
|---------|--------|-------|---------------|----------------------------------------------------------|------------------------------------|
| CG1883  | 22156  | 130   | 5             | Ribosomal protein S7                                     |                                    |
| CG8863  | 45886  | 129   | 3             |                                                          |                                    |
| CG10652 | 12398  | 129   | 4             | Ribosomal protein L30                                    |                                    |
| CG3379  | 11374  | 129   | 5             | Histone H4                                               | nucleosome                         |
| CG4202  | 49538  | 124   | 3             | UTP3 homolog Sas10                                       | small subunit processome           |
| CG10944 | 28882  | 124   | 6             | Ribosomal protein S6                                     |                                    |
| CG1542  | 35056  | 123   | 2             | Ebp2                                                     | rRNA processing                    |
| CG7246  | 70572  | 122   | 4             | UTP6 homolog                                             | small-subunit processome           |
| CG11276 | 29230  | 120   | 5             | Ribosomal protein S4                                     |                                    |
| CG2960  | 15005  | 119   | 6             | Ribosomal protein L40                                    |                                    |
| CG32253 | 41408  | 117   | 2             | BRX1 homolog                                             | ribosomal large subunit biogenesis |
| CG12050 | 111364 | 116   | 2             | UTP17, WDR75                                             | small-subunit processome           |
| CG6937  | 39594  | 116   | 3             |                                                          | RNA binding                        |
| CG8900  | 17658  | 116   | 3             | Ribosomal protein S18                                    |                                    |
| CG9888  | 34673  | 113   | 3             | Fibrillarin                                              | small subunit processome           |
| CG17870 | 28379  | 110   | 2             | 14-3-3zeta                                               |                                    |
| CG8922  | 25760  | 109   | 2             | Ribosomal protein S5a                                    |                                    |
| CG16944 | 33116  | 109   | 3             | stress-sensitive B                                       |                                    |
| CG13097 | 76056  | 108   | 5             | Mpp10 superfamily                                        | small subunit processome           |
| CG7434  | 30649  | 107   | 4             | Ribosomal protein L22                                    |                                    |
| CG3949  | 14045  | 102   | 2             | hoi-polloi                                               | small subunit processome           |
| CG3661  | 15041  | 102   | 5             | Ribosomal protein L23                                    |                                    |
| CG9688  | 16406  | 101   | 4             | mitochondrial ribosomal protein S18C                     |                                    |
| CG3983  | 66457  | 101   | 5             |                                                          |                                    |
| CG30349 | 68663  | 99    | 4             | UTP5 homolog                                             | small-subunit processome           |
| CG32031 | 61511  | 98    | 5             | Arginine kinase                                          | arginine kinase activity           |
| CG33505 | 53823  | 97    | 2             | U3-55k, RRP9 homolog                                     | rRNA processing                    |
| CG3395  | 22610  | 97    | 5             | Ribosomal protein S9                                     |                                    |
| CG4258  | 39989  | 96    | 2             | dribble, KRR1 small subunit processome component homolog | small subunit processome           |
| CG31022 | 63360  | 95    | 2             | prolyl-4-hydroxylase-alpha EFB                           |                                    |
| CG3071  | 60559  | 95    | 2             | UTP15 superfamily                                        | small subunit processome           |
| CG11999 | 23847  | 95    | 2             |                                                          | membrane                           |
| CG8849  | 29198  | 93    | 2             | mitochondrial ribosomal protein L24                      |                                    |
| CG7977  | 29445  | 91    | 3             | Ribosomal protein L23A                                   |                                    |
| CG7057  | 50109  | 90    | 2             | AP-50                                                    |                                    |
| CG40049 | 46298  | 89    | 2             | mitochondrial ribosomal protein S5                       |                                    |
| CG31256 | 74341  | 88    | 2             | Brf                                                      |                                    |
| CG6779  | 27682  | 87    | 2             | Ribosomal protein S3                                     |                                    |
| CG31618 | 13355  | 87    | 3             | Histone H2A                                              | Nucleosome                         |
| CG1821  | 14581  | 84    | 2             | Ribosomal protein L31                                    |                                    |
| CG2998  | 7529   | 83    | 2             | Ribosomal protein S28b                                   |                                    |
| CG4027  | 42194  | 81    | 3             | Actin 5C                                                 |                                    |
| CG5650  | 35260  | 80    | 2             | Protein phosphatase 1 at 87B                             |                                    |
| CG4260  | 106352 | 80    | 2             | alpha-Adaptin                                            |                                    |
| CG12792 | 51166  | 78    | 2             | lethal (2) 09851                                         |                                    |

## FKBP39\_1-150\_CprA

| CG      | Size   | Score | # of peptides | Full Name                     | Function                 |
|---------|--------|-------|---------------|-------------------------------|--------------------------|
| CG1475  | 23803  | 74    | 2             | Ribosomal protein L13A        |                          |
| CG3428  | 36006  | 74    | 3             |                               |                          |
| CG1524  | 16312  | 73    | 3             | Ribosomal protein S14a        |                          |
| CG4364  | 74045  | 72    | 2             | Pescadillo homolog            | rRNA processing          |
| CG12325 | 107064 | 69    | 2             | UTP1 homolog                  | small-subunit processome |
| CG6846  | 17270  | 69    | 3             | Ribosomal protein L26         |                          |
| CG13389 | 17168  | 67    | 2             | Ribosomal protein S13         |                          |
| CG12785 | 136870 | 67    | 2             | UTP22 homolog, Mat988Ba, NOL6 | small-subunit processome |
| CG7610  | 33078  | 64    | 2             | ATP synthase-gamma chain      |                          |
| CG8615  | 21822  | 64    | 2             | Ribosomal protein L18         |                          |
| CG10596 | 70619  | 61    | 2             | Msr-110                       |                          |
| CG5148  | 110554 | 59    | 2             |                               |                          |
| CG1142  | 32732  | 59    | 2             | Fcf2 superfamily              | rRNA processing          |
| CG18174 | 34550  | 58    | 2             | Rpn11                         |                          |
| CG1651  | 172000 | 58    | 2             | Ankyrin                       |                          |
| CG8415  | 16064  | 58    | 2             | Ribosomal protein S23         |                          |
| CG10206 | 57477  | 58    | 2             | UTP22, NOL6, NOP5             | small-subunit processome |
| CG18001 | 8252   | 55    | 2             | Ribosomal protein L38         |                          |
| CG3251  | 58063  | 55    | 2             |                               |                          |
| CG3132  | 72137  | 54    | 2             | Ect3                          |                          |
| CG33555 | 165412 | 51    | 2             | bitesize                      |                          |

small subunit processome  
also present in full-length  
pull-down
