# Supplementary material for: The Pentameric Nucleoplasmin Fold Is Present in Drosophila FKBP39 and a Large Number of Chromatin-Related Proteins
Source: PubMed Central journal article supplement (PMC4414354; doi:10.1016/j.jmb.2015.03.010), 2015-05-22
Supplement: mmc5.pdf [file mmc5.pdf]

## FKBP39\_151-357\_CprA

| CG #    | Size   | Score | #of peptides | Full name                                      |
|---------|--------|-------|--------------|------------------------------------------------|
| CG8947  | 39376  | 1106  | 59           | FK506-binding protein 1                        |
| CG11999 | 71372  | 801   | 40           | Heat shock protein cognate 4                   |
| CG7808  | 50571  | 754   | 41           | beta-Tubulin at 56D                            |
| CG10652 | 72330  | 386   | 13           | Heat shock protein cognate 3                   |
| CG15792 | 50486  | 287   | 10           | alpha-Tubulin at 84D                           |
| CG2411  | 51387  | 242   | 12           | beta-Tubulin at 60D                            |
| CG10377 | 62622  | 227   | 4            |                                                |
| CG2168  | 60885  | 212   | 5            | Heat shock protein 60                          |
| CG2135  | 42072  | 150   | 5            | Actin 88F                                      |
| CG3195  | 23618  | 136   | 5            | mad2                                           |
| CG2960  | 17891  | 115   | 3            | Ribosomal protein L12                          |
| CG32031 | 107009 | 111   | 5            |                                                |
| CG31915 | 62661  | 101   | 2            | 26-29kD-proteinase                             |
| CG10824 | 51030  | 87    | 5            | Elongation factor 1alpha100E                   |
| CG12101 | 23847  | 86    | 2            |                                                |
| CG5178  | 15005  | 82    | 3            | Ribosomal protein L40                          |
| CG17498 | 23859  | 82    | 2            | Ribosomal protein S8                           |
| CG31198 | 12398  | 81    | 2            | Ribosomal protein L30                          |
| CG1873  | 61511  | 64    | 3            | Arginine kinase                                |
| CG4957  | 237395 | 64    | 2            | zipper                                         |
| CG2512  | 71446  | 63    | 3            |                                                |
| CG3401  | 144051 | 62    | 2            | patched                                        |
| CG4147  | 44970  | 61    | 2            | Heterogeneous nuclear ribonucleoprotein at 27C |
| CG4264  | 30549  | 59    | 2            | Ribosomal protein S3A                          |
| CG9277  | 79480  | 52    | 2            |                                                |
| CG6226  | 27749  | 50    | 5            |                                                |

also present in full-length pull-down
