# Supplementary material for: The Pentameric Nucleoplasmin Fold Is Present in Drosophila FKBP39 and a Large Number of Chromatin-Related Proteins
Source: PubMed Central journal article supplement (PMC4414354; doi:10.1016/j.jmb.2015.03.010), 2015-05-22
Supplement: mmc6.pdf [file mmc6.pdf]

# Supplementary Figures and Methods

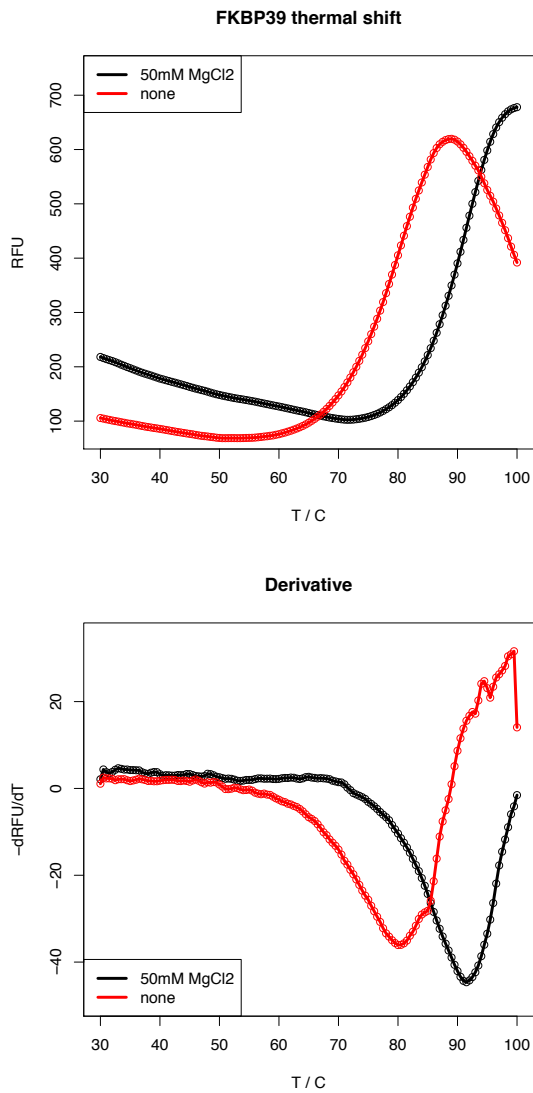

**Supplementary Figure 1** Thermal shift assay of FKBP39 NPL-domain (residues 1-92). The two melting curves are FKBP39 in the presence or absence of 50 mM MgCl<sub>2</sub>. The lower panel shows the temperature derivative to reveal the maximum. The two curves are separated by more than 10 °C.

**A**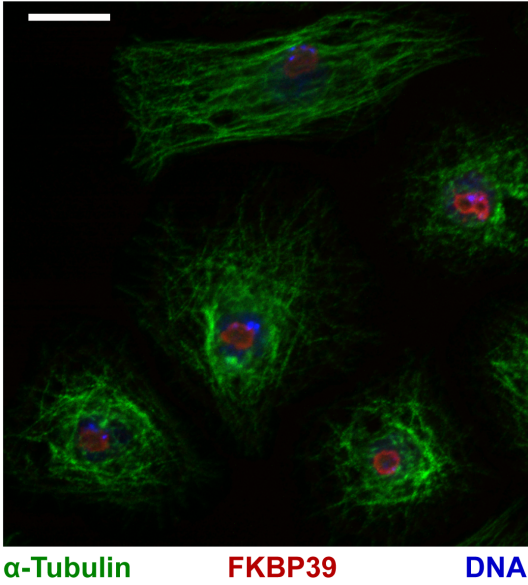**B**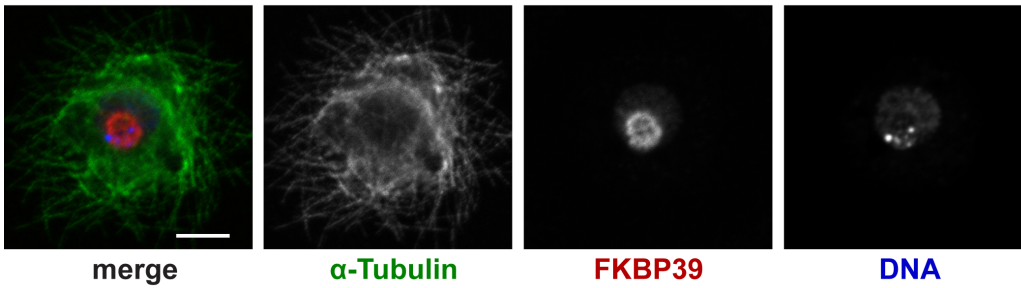

**Supplementary Figure 2** FKBP39 localises to nucleoli in *Drosophila melanogaster* D.Mel-2 cells. (A) Field of view as seen in confocal microscope. Cultured D.Mel-2 cells were fixed and stained with specific antibodies to reveal the localisation of  $\alpha$ -tubulin in green, FKBP39 in red and DNA in blue. *Drosophila* cells usually contain just one big nucleolus. Scale bar is 10  $\mu$ m. (B) An exemplary interphase cell stained as in (A); images acquired in individual channels shown in grayscale. Scale bar is 5  $\mu$ m.

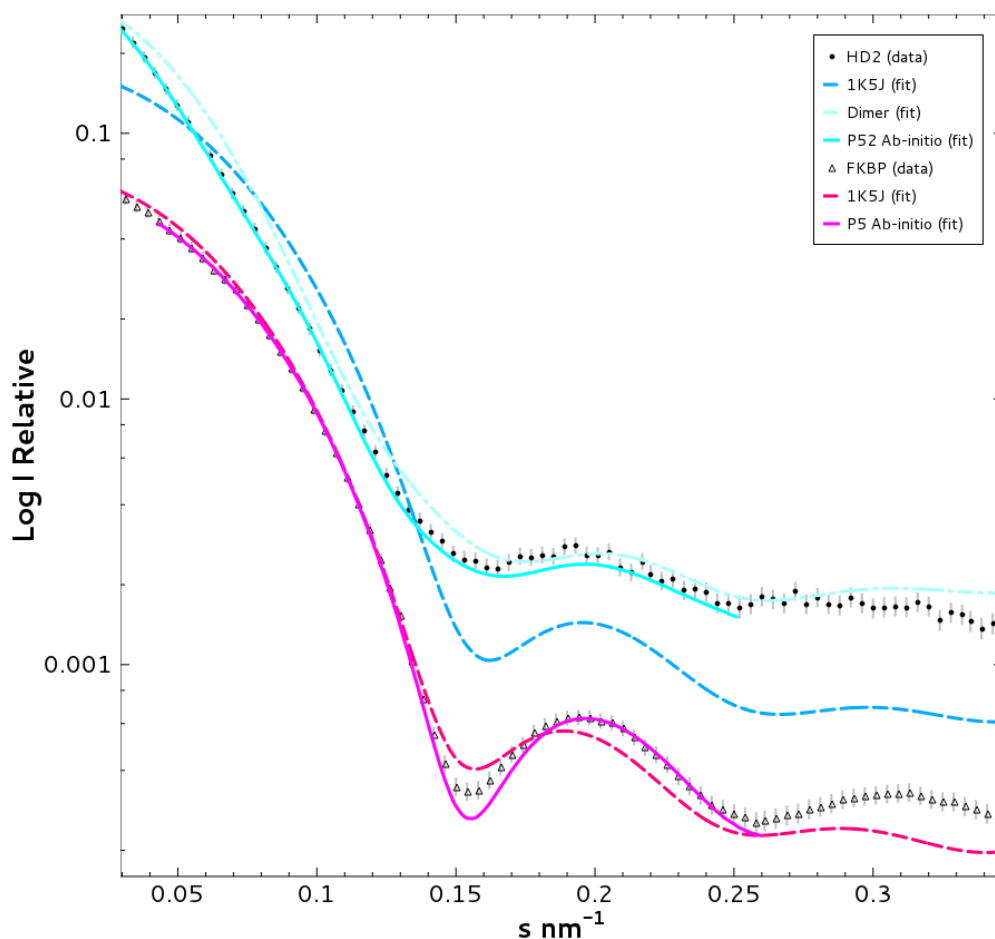

**Supplementary Figure 3** SAXS scattering curves of FKBP39 and HD2 NPL. The figure shows experimental data for HD2 top (black circles) and FKBP39 bottom (triangles) overlaid with the fits of the *ab-initio* envelopes (solid lines) and structures (dashed) in shades of blue and pink for HD2 and FKBP respectively. HD2 has fits from the monomeric structure of nucleoplasmin (1K5J) and a putative dimer. Fits show a good agreement for a decameric configuration for HD2 and a pentameric configuration for FKBP39 in solution.

## Supplementary Methods

### Thermal shift

Buffers (50 mM final concentration) and salt (50-250 mM final concentration) were pipetted into a 96-well thin wall PCR plate (Bio-Rad, Hercules, CA). Protein (1  $\mu$ M final concentration) and SYBRO orange (2x final concentration) were added and the plate sealed with optical film (Bio-Rad). The plates were placed into an iQ5 thermal cycler (Bio-Rad) and equilibrated at 25  $^{\circ}$ C for two minutes. Temperature was ramped from 25 to 95  $^{\circ}$ C in intervals of 0.5  $^{\circ}$ C and 30 seconds per interval.

### Microscopy

*Drosophila melanogaster* D.mel-2 cells were cultured as described earlier. For the purpose of microscopy they were grown on Concanavalin A-coated cover slips and fixed with 4 % formaldehyde according to standard procedures. Staining and microscopy were performed exactly as in<sup>30</sup> using the following antibodies: mouse monoclonal anti- $\alpha$ Tubulin (clone DM1 $\alpha$ ; SIGMA) at 1:1000, rabbit anti-FKBP39 (gift from Renato Paro, ETH) at 1:2000, and counter-stained with DAPI present in the Prolong Gold Anti-Fade mounting medium (Life Technologies). Images acquired on Zeiss Meta510 confocal microscope (100x objective) were processed using ImageJ (NIH, USA).
